# Supplementary material
Source: ML conference proceedings conference paper supplement (https://aclanthology.org/D18-1030)
Supplement: Attachment [file D18-1030.Attachment.pdf]

## Supplemental Material

### Global Constraints:

- **Single languages:**

|    |     |    |     |         |     |
|----|-----|----|-----|---------|-----|
| af | am  | ar | az  | be      | bg  |
| bn | bs  | ca | ceb | co      | cs  |
| cy | da  | de | el  | en      | eo  |
| es | et  | eu | fa  | fi      | fil |
| fr | fy  | ga | gd  | gl      | gu  |
| ha | haw | he | hi  | hi-Latn | hr  |
| ht | hu  | hy | id  | ig      | is  |
| it | ja  | jv | ka  | kk      | km  |
| kn | ko  | ku | ky  | la      | lb  |
| lo | lt  | lv | mg  | mi      | mk  |
| ml | mn  | mr | ms  | mt      | my  |
| ne | nl  | no | ny  | or      | pa  |
| pl | ps  | pt | ro  | ru      | si  |
| sk | sl  | sm | sn  | so      | sq  |
| sr | su  | sv | sw  | ta      | te  |
| tg | th  | tr | uk  | ur      | uz  |
| vi | yi  | yo | zh  |         |     |

- **Language pairs:**

|        |       |       |            |        |       |
|--------|-------|-------|------------|--------|-------|
| en/af  | en/am | en/ar | en/az      | en/be  | en/bg |
| en/bn  | en/bs | en/ca | en/ceb     | en/co  | en/cs |
| en/cy  | en/da | en/de | en/el      | en/eo  | en/es |
| en/et  | en/eu | en/fa | en/fi      | en/fil | en/fr |
| en/fy  | en/ga | en/gd | en/gl      | en/gu  | en/ha |
| en/haw | en/he | en/hi | en/hi-Latn | en/hr  | en/ht |
| en/hu  | en/hy | en/id | en/ig      | en/is  | en/it |
| en/ja  | en/jv | en/ka | en/kk      | en/km  | en/kn |
| en/ko  | en/ku | en/ky | en/la      | en/lb  | en/lo |
| en/lt  | en/lv | en/mg | en/mi      | en/mk  | en/ml |
| en/mn  | en/mr | en/ms | en/mt      | en/my  | en/ne |
| en/nl  | en/no | en/ny | en/or      | en/pa  | en/pl |
| en/ps  | en/pt | en/ro | en/ru      | en/si  | en/sk |
| en/sl  | en/sm | en/sn | en/so      | en/sq  | en/sr |
| en/su  | en/sv | en/sw | en/ta      | en/te  | en/tg |
| en/th  | en/tr | en/uk | en/ur      | en/uz  | en/vi |
| en/yi  | en/yo | en/zh | hi/hi-Latn |        |       |

## Number of Parameters:

- Full model:

| Variables                               | Size             |
|-----------------------------------------|------------------|
| Char unigram embedding                  | 1000*16          |
| Char bigram embedding                   | 1000*16          |
| Char trigram embedding                  | 3000*16          |
| Char quadgram embedding                 | 5000*16          |
| Script embedding                        | 27*8             |
| Lexicon language distribution embedding | 16*100           |
| Lexicon active languages embedding      | 16*100           |
| Lexicon singletons embedding            | 16*100           |
| Hidden layer W                          | $256*(16*3*7+8)$ |
| Hidden layer bias                       | 256              |
| Softmax layer W                         | 256*100          |
| Softmax layer bias                      | 100              |
| <hr/>                                   |                  |
| Total                                   | 279036           |

- Small model (without lexicon features):

| Variables               | Size             |
|-------------------------|------------------|
| Char unigram embedding  | 1000*16          |
| Char bigram embedding   | 1000*16          |
| Char trigram embedding  | 3000*16          |
| Char quadgram embedding | 5000*16          |
| Script embedding        | 27*8             |
| Hidden layer W          | $256*(16*3*4+8)$ |
| Hidden layer bias       | 256              |

|                    |         |
|--------------------|---------|
| Softmax layer W    | 256*100 |
| Softmax layer bias | 100     |
| <hr/>              |         |
| Total              | 237372  |

## Per-language Results on KB-Mono56:

Test Count: Number of labels in prediction

Gold Count: Number of labels in gold

| Label | F1-Score | Precision | Recall | Test Count | Gold Count |
|-------|----------|-----------|--------|------------|------------|
| af    | 0.00     | 0.00      | 0.00   | 2          | 0          |
| ar    | 99.84    | 99.79     | 99.89  | 1899       | 1897       |
| be    | 0.00     | 0.00      | 0.00   | 3          | 0          |
| bg    | 99.73    | 99.67     | 99.78  | 1842       | 1840       |
| bn    | 100.00   | 100.00    | 100.00 | 2677       | 2677       |
| bs    | 0.00     | 0.00      | 0.00   | 108        | 0          |
| ca    | 95.44    | 99.96     | 91.31  | 2419       | 2648       |
| ceb   | 0.00     | 0.00      | 0.00   | 3          | 0          |
| co    | 0.00     | 0.00      | 0.00   | 12         | 0          |
| cs    | 96.41    | 98.17     | 94.71  | 1588       | 1646       |
| cy    | 97.25    | 100.00    | 94.64  | 2825       | 2985       |
| da    | 94.51    | 100.00    | 89.58  | 1548       | 1728       |
| de    | 97.49    | 100.00    | 95.10  | 2560       | 2692       |
| el    | 100.00   | 100.00    | 100.00 | 2072       | 2072       |
| en    | 57.34    | 40.30     | 99.34  | 6365       | 2582       |
| eo    | 0.00     | 0.00      | 0.00   | 5          | 0          |
| es    | 97.36    | 99.17     | 95.63  | 2515       | 2608       |
| et    | 96.15    | 100.00    | 92.58  | 1235       | 1334       |

|         |        |        |        |      |      |
|---------|--------|--------|--------|------|------|
| eu      | 96.74  | 99.78  | 93.87  | 1381 | 1468 |
| fa      | 99.80  | 99.91  | 99.69  | 2235 | 2240 |
| fi      | 96.46  | 100.00 | 93.15  | 1551 | 1665 |
| fil     | 96.35  | 99.93  | 93.01  | 2757 | 2962 |
| fr      | 97.15  | 99.07  | 95.29  | 2473 | 2571 |
| fy      | 0.00   | 0.00   | 0.00   | 1    | 0    |
| gl      | 0.00   | 0.00   | 0.00   | 3    | 0    |
| gu      | 100.00 | 100.00 | 100.00 | 3647 | 3647 |
| ha      | 0.00   | 0.00   | 0.00   | 4    | 0    |
| hi      | 98.90  | 100.00 | 97.82  | 2916 | 2981 |
| hi-Latn | 0.00   | 0.00   | 0.00   | 1    | 0    |
| hr      | 94.73  | 99.36  | 90.51  | 2045 | 2245 |
| ht      | 95.59  | 100.00 | 91.55  | 1637 | 1788 |
| hu      | 95.64  | 100.00 | 91.65  | 1909 | 2083 |
| hy      | 100.00 | 100.00 | 100.00 | 1883 | 1883 |
| id      | 58.35  | 42.99  | 90.79  | 4196 | 1987 |
| is      | 97.93  | 99.90  | 96.04  | 2086 | 2170 |
| it      | 95.67  | 99.67  | 91.97  | 1839 | 1993 |
| iw      | 100.00 | 100.00 | 100.00 | 1829 | 1829 |
| ja      | 99.77  | 100.00 | 99.55  | 3509 | 3525 |
| ka      | 100.00 | 100.00 | 100.00 | 1649 | 1649 |
| kn      | 100.00 | 100.00 | 100.00 | 2170 | 2170 |
| ko      | 100.00 | 100.00 | 100.00 | 3362 | 3362 |
| ku      | 0.00   | 0.00   | 0.00   | 9    | 0    |
| lt      | 98.94  | 99.85  | 98.05  | 1360 | 1385 |

|    |        |        |        |      |      |
|----|--------|--------|--------|------|------|
| mi | 0.00   | 0.00   | 0.00   | 1    | 0    |
| mk | 99.53  | 100.00 | 99.06  | 2098 | 2118 |
| ml | 100.00 | 100.00 | 100.00 | 1838 | 1838 |
| mn | 0.00   | 0.00   | 0.00   | 2    | 0    |
| mr | 99.88  | 99.86  | 99.90  | 2086 | 2085 |
| ms | 23.23  | 88.21  | 13.37  | 458  | 3021 |
| ne | 98.72  | 97.46  | 100.00 | 2445 | 2383 |
| nl | 97.05  | 99.96  | 94.30  | 2350 | 2491 |
| no | 95.91  | 97.04  | 94.80  | 2198 | 2250 |
| or | 100.00 | 100.00 | 100.00 | 5534 | 5534 |
| pa | 100.00 | 100.00 | 100.00 | 3930 | 3930 |
| pl | 97.47  | 99.95  | 95.10  | 1905 | 2002 |
| ps | 0.00   | 0.00   | 0.00   | 2    | 0    |
| pt | 97.63  | 100.00 | 95.37  | 3048 | 3196 |
| ro | 96.29  | 99.96  | 92.88  | 2455 | 2642 |
| ru | 99.75  | 100.00 | 99.51  | 1423 | 1430 |
| si | 100.00 | 100.00 | 100.00 | 2499 | 2499 |
| sk | 93.07  | 99.89  | 87.11  | 1807 | 2072 |
| sl | 95.32  | 100.00 | 91.06  | 1629 | 1789 |
| sr | 0.00   | 0.00   | 0.00   | 20   | 0    |
| sv | 97.38  | 99.84  | 95.03  | 1935 | 2033 |
| sw | 0.00   | 0.00   | 0.00   | 13   | 0    |
| ta | 100.00 | 100.00 | 100.00 | 1855 | 1855 |
| te | 100.00 | 100.00 | 100.00 | 3470 | 3470 |
| th | 100.00 | 100.00 | 100.00 | 3253 | 3253 |

|    |        |        |        |      |      |
|----|--------|--------|--------|------|------|
| tr | 98.55  | 99.55  | 97.57  | 1573 | 1605 |
| uk | 100.00 | 100.00 | 100.00 | 1595 | 1595 |
| vi | 97.48  | 100.00 | 95.09  | 3274 | 3443 |
| yo | 0.00   | 0.00   | 0.00   | 8    | 0    |
| zh | 99.89  | 99.78  | 100.00 | 5530 | 5518 |

### Language Pairs for Synthetic Data:

|        |       |       |            |        |       |
|--------|-------|-------|------------|--------|-------|
| en/af  | en/am | en/ar | en/az      | en/be  | en/bg |
| en/bn  | en/bs | en/ca | en/ceb     | en/co  | en/cs |
| en/cy  | en/da | en/de | en/el      | en/eo  | en/es |
| en/et  | en/eu | en/fa | en/fi      | en/fil | en/fr |
| en/fy  | en/ga | en/gd | en/gl      | en/gu  | en/ha |
| en/haw | en/he | en/hi | en/hi-Latn | en/hr  | en/ht |
| en/hu  | en/hy | en/id | en/ig      | en/is  | en/it |
| en/ja  | en/jv | en/ka | en/kk      | en/km  | en/kn |
| en/ko  | en/ku | en/ky | en/la      | en/lb  | en/lo |
| en/lt  | en/lv | en/mg | en/mi      | en/mk  | en/ml |
| en/mn  | en/mr | en/ms | en/mt      | en/my  | en/ne |
| en/nl  | en/no | en/ny | en/or      | en/pa  | en/pl |
| en/ps  | en/pt | en/ro | en/ru      | en/si  | en/sk |
| en/sl  | en/sm | en/sn | en/so      | en/sq  | en/sr |
| en/su  | en/sv | en/sw | en/ta      | en/te  | en/tg |
| en/th  | en/tr | en/uk | en/ur      | en/uz  | en/vi |
| en/yi  | en/yo | en/zh | hi/hi-Latn |        |       |
